# Supplementary material for: Spermatozoa lacking Fertilization Influencing Membrane Protein (FIMP) fail to fuse with oocytes in mice
Source: PubMed Central journal article supplement (PMC7196805; doi:10.1073/pnas.1917060117), 2020-04-15
Supplement: pnas.1917060117.sapp.pdf [file pnas.1917060117.sapp.pdf]

Supplementary Information for

## **Spermatozoa lacking Fertilization Influencing Membrane Protein (FIMP) fail to fuse with oocytes in mice**

Yoshitaka Fujihara<sup>1,2,3</sup>, Yonggang Lu<sup>1</sup>, Taichi Noda<sup>1</sup>, Asami Oji<sup>1,4</sup>, Tamara Larasati<sup>1,5</sup>, Kanako Kojima-Kita<sup>1,5</sup>, Zhifeng Yu<sup>2</sup>, Ryan M. Matzuk<sup>2</sup>, Martin M. Matzuk<sup>2\*</sup> and Masahito Ikawa<sup>1,5,6\*</sup>

<sup>1</sup> Research Institute for Microbial Diseases, Osaka University, 3-1 Yamadaoka, Suita, Osaka 565-0871, Japan. <sup>2</sup> Center for Drug Discovery and Department of Pathology & Immunology, Baylor College of Medicine, One Baylor Plaza, Houston, TX 77030. <sup>3</sup> Department of Bioscience and Genetics, National Cerebral and Cardiovascular Center, 6-1 Kishibeshinmachi, Suita, Osaka 564-8565, Japan. <sup>4</sup> Laboratory for Developmental Epigenetics, RIKEN Center for Biosystems Dynamics Research, 2-2-3 Minatojima-minamimachi, Chuo-ku, Kobe, Hyogo 650-0047, Japan. <sup>5</sup> Graduate School of Medicine, Osaka University, 2-2 Yamadaoka, Suita, Osaka 565-0871, Japan. <sup>6</sup> The Institute of Medical Science, The University of Tokyo, 4-6-1 Shirokanedai, Minato-ku, Tokyo 108-8639, Japan.

\* Corresponding authors:

Martin M. Matzuk, MD, PhD and Masahito Ikawa, PhD

Email: mmatzuk@bcm.edu and ikawa@biken.osaka-u.ac.jp

### **This PDF file includes:**

Supplementary text

Figures S1 to S5

Tables S1

SI References

## Supplementary Information Text

**RT-PCR analysis.** Mouse cDNA was prepared from multiple adult tissues of wild-type mice (1). Briefly, using TRIzol reagent (Invitrogen, CA, USA), total RNA was isolated from multiple adult tissues of wild-type mice and multiple adult human tissues obtained from the Human Tissue Acquisition & Pathology Core. Informed consent of these human tissues was obtained. Mouse and human cDNA were prepared using SuperScript III Reverse Transcriptase (Invitrogen) following the manufacturer's instruction. The amplification conditions were 1 min at 94°C, followed by 30-35 cycles of 94°C for 30 sec, 65°C for 30 sec, and 72°C for 30 sec, with a final 7-min extension at 72°C. The primers used are listed in Table S1.

**Amplification and sequencing of the mouse *Fimp* variants.** The cDNAs encoding the mouse *Fimp* (4930451/11Rik) were amplified by PCR using wild-type mouse testis cDNAs as a template. Each amplified fragment (XbaI-XhoI) was introduced into a pBluescript II SK (+) vector and was performed by sequencing. The primers used are listed in Table S1.

**Antibodies.** The monoclonal antibodies used here were as described previously: KS64-125 for IZUMO1 (2). The BASIGIN (sc-9757) and FLAG (F1804) antibodies were purchased from Santa Cruz Biotechnology and Sigma Aldrich, respectively. Dilutions used were 1:200 to 1:300 for immunostaining and 1:500 to 1:1000 for immunoblot analysis.

**Immunostaining.** Immunostaining was performed as described previously (3, 4). A confocal microscopic observation was performed as described previously (5). Observation was used by BZ-X710 microscope (Keyence, Osaka, Japan) and Eclipse Ti microscope connected to a Nikon C2 confocal module (Nikon, Tokyo, Japan).

**Immunoblot analysis.** Immunoblot analysis was performed as described previously (6). Briefly, sperm samples were collected from cauda epididymis. These samples were homogenized in lysis buffer containing 1% Triton X-100 and 1% protease inhibitor (Nacalai Tesque, Kyoto, Japan) and then were centrifuged (10,000g for 20 min at 4°C), and the supernatants were collected. Protein lysates were separated by SDS/PAGE under reducing conditions and transferred to PVDF membranes (Merck Millipore, MA, USA). After blocking, blots were incubated with primary antibodies overnight at 4°C and then incubated with secondary antibodies conjugated with horseradish-peroxidase. Detection was performed using Chemi-Lumi One Ultra (Nacalai Tesque).

**Male fertility test.** Sexually mature mutant male mice were caged with 2-month-old B6D2F1 or mutant females for several months, and the number of pups in each cage was counted within a week of birth. Average litter sizes (pups per plug) are presented as the number of total pups born divided by the number of plugs for each genotype.

**Testis histology and sperm morphology.** After breeding studies, males were killed by cervical dislocation following anesthesia. Testes were weighed individually. Testes were fixed in 4% paraformaldehyde in PBS and were processed for paraffin and OCT (Optimal Cutting Temperature) embeddings. Paraffin and frozen

sections were cut 5  $\mu$ m. Paraffin sections stained with periodic acid-Schiff (PAS) and then counterstained with Mayer hematoxylin solution (Wako, Osaka, Japan). The cauda epididymal spermatozoa were dispersed in PBS, and subsequently sperm morphology was observed under a phase-contrast microscope (BX50, Olympus, Tokyo, Japan).

***In vitro* fertilization.** *In vitro* fertilization using mouse spermatozoa was performed as described previously (7).

**HEK293T-oocyte binding assay.** The open reading frame (ORF) of *Fimp* was cloned from mouse testis cDNA and conjugated with a Kozak sequence on the N-terminus and a FLAG tag on the C-terminus by RT-PCR. The PCR amplicon was inserted into the pCAG1.1 vector that contains a CAG promoter and a rabbit beta-globin polyadenylation signal. An expression vector bearing mCherry-tagged mouse *Izumo1* ORF was constructed in a similar manner. HEK293T cells were transfected with the expression vectors by calcium phosphate-DNA co-precipitation method. After 2 days of incubation, the HEK293T cells were resuspended in PBS containing 10 mM EDTA and stained with Hoechst33342. Oocytes were harvested from hormone-primed B6D2F1 females and treated with collagenase to remove zona pellucida (ZP). The ZP-free oocytes were incubated with  $1 \times 10^4$  HEK293T cells in 100  $\mu$ L TYH medium drops for 2 hours and observed under a Nikon Eclipse Ti confocal laser scanning microscope.



**Fig. S1. Nucleotide and amino acid sequence alignments of 493045111Rik.** (A) Nucleotide sequence alignments of TM (+) and (-) forms of 493045111Rik. The sizes of the coding regions of TM (+) and (-) isoforms are 336 bp and 279 bp, respectively. Two variants match from the start codon (ATG) to the 226th nucleotide (75 of 111 amino acids in TM form). Black indicates a match in two sequences. (B, C) Protein structure prediction of the TM form of 493045111Rik. 493045111Rik is predicted to be a type I single-pass transmembrane protein with a signal peptide (1-23 aa), extracellular region (24-79 aa), transmembrane domain (80-102 aa), and intracellular region (103-111 aa). TMHMM-2.0 (B; <https://services.healthtech.dtu.dk/service.php?TMHMM-2.0>) and SignalP-5.0 (C; <http://www.cbs.dtu.dk/services/SignalP-5.0/>) software were used for this prediction. (D) Amino acid sequence similarity of 493045111Rik (C16ORF92) among 51 eutherian mammals [Mus musculus (TM form) (NP\_898954.2), Homo sapiens (NP\_001103129.1), Rattus norvegicus (XP\_006230382.1), Macaca mulatta (XP\_028696348.1), Pan troglodytes (XP\_024205252.1), Pongo abelii (XP\_024089881.1), Equus caballus (XP\_023471801.1), Loxodonta africana (XP\_010596870.1), Canis lupus familiaris (XP\_022275594.1), Cricetulus griseus (XP\_003510157.1), Sarcophilus harrisii (XP\_003762137.2), Ootolemur garnettii (XP\_003795833.1), Pan paniscus (XP\_024781780.1), Papio anubis (XP\_021788977.1), Felis catus (XP\_019676281.1), Tursiops truncatus (XP\_004322135.1), Trichechus manatus latirostris (XP\_004386820.1), Mesocricetus auratus (XP\_021084589.1), Bos taurus (XP\_024840882.1), Macaca fascicularis (XP\_005591661.2), Capra hircus (XP\_005698060.1), Myotis brandtii (XP\_014385310.1), Vicugna pacos (XP\_006201327.1), Pteropus Alecto (XP\_006914291.1), Panthera tigris altaica (XP\_007093532.1), Lipotes vexillifer (XP\_007452897.1), Monodelphis domestica (XP\_007499498.1), Eptesicus fuscus (XP\_008151135.2), Bison bison bison (XP\_010835734.1), Pteropus vampyrus (XP\_011377119.1), Macaca nemestrina (XP\_024648911.1), Microcebus murinus (XP\_020137317.1), Panthera pardus (XP\_019291908.1), Bos indicus (XP\_019842700.1), Castor canadensis (XP\_020013549.1), Pogona vitticeps (XP\_020654487.1), Odocoileus virguntianus texanus (XP\_020740246.1), Phascolarctos cinereus (XP\_020862576.1), Meriones unguiculatus (XP\_021491510.1), Neomonachus schauinslandi (XP\_021556072.1), Enhydra lutris kenyoni (XP\_022382344.1), Desmodus rotundus (XP\_024416141.1), Puma concolor (XP\_025775725.1), Urocyon parryi (XP\_026236702.1), Acinonyx jubatus (XP\_026907355.1), Lagenorhynchus obliquidens (XP\_026981320.1), Zalophus californianus (XP\_027468046.1), Phrynosoma macleodi (XP\_028354856.1), Podarcis muralis (XP\_028560415.1), Rhinatrema bivittatum (XP\_029460801.1), Suricata suricatta (XP\_029803280.1)]. The green box indicates a putative transmembrane domain. 493045111Rik is conserved broadly in mammals.

**A**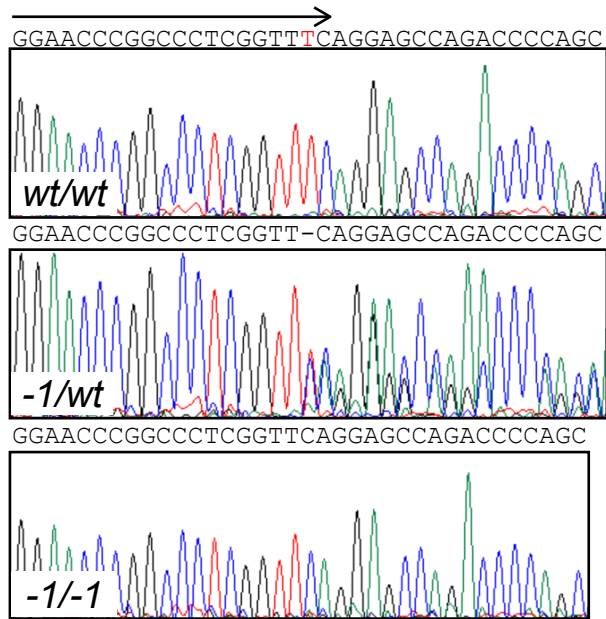**B**

|                  |    |                                                              |     |
|------------------|----|--------------------------------------------------------------|-----|
| Wild-type TM (+) | 1  | MKLWLWVAVGVWMLMAELGTIETAPRRDGTGPSVSGARPPQVVNRLFFDYPDSDRASLLA | 60  |
| Wild-type TM(-)  | 1  | MKLWLWVAVGVWMLMAELGTIETAPRRDGTGPSVSGARPPQVVNRLFFDYPDSDRASLLA | 60  |
| 1 bp deletion    | 1  | MKLWLWVAVGVWMLMAELGTIETAPRRDGTGPSVQEPDPSKL                   | 42  |
|                  |    |                                                              |     |
| Wild-type TM (+) | 61 | VARFIDGEKPIITFVKTDSSPGLFQNTLVGTLVVAFFLLFQFCLHVNFKGA          | 111 |
| Wild-type TM(-)  | 61 | VARFIDGEKPIITFVKTGTSRKGPNELISSQSQLR                          | 92  |

**C**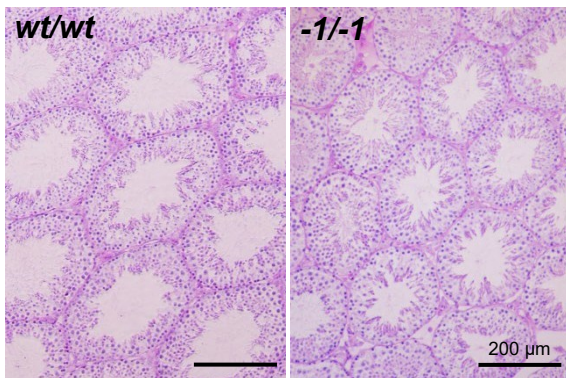**D**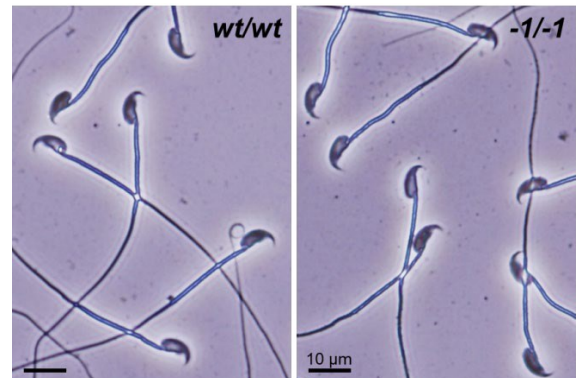

**Fig. S2. Generation of *4930451111Rik* KO mice with CRISPR/Cas9.** (A) Direct sequencing waveforms of the 1 bp deletion (5'-T-3', indicated by red letter) in the second exon of *4930451111Rik* gene. Arrow indicates gRNA sequence. (B) Amino acid sequence of *4930451111Rik* KO mice. The 1 bp deletion caused a frameshift mutation leading to a premature termination codon after the 42nd amino acid of both isoforms (111 amino acids in wild-type TM (+) form and 92 amino acids in wild-type TM (-) form). The putative transmembrane domain is indicated by the red box. Black indicates a match in all sequences, whereas gray indicates a match in two sequences. (C) Representative testicular histology sections stained with hematoxylin and eosin. Spermatogenesis in *4930451111Rik* KO (-1/-1) mice is normal compared to that in wild-type (wt) mice. Scale bars: 200  $\mu$ m. (D) Cauda epididymal spermatozoa from wild-type and *4930451111Rik* KO mice. Sperm morphology in *4930451111Rik* KO (-1/-1) mice is normal compared to that in wild-type (wt) mice. Scale bars: 10  $\mu$ m.

**A**

CCTATAACGTTTCGTTAAGACAGGTATGAATCAGCTTGATAGAGGGGCCTAATGA

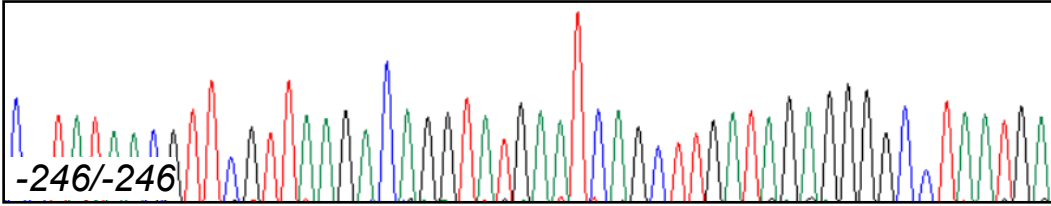**B**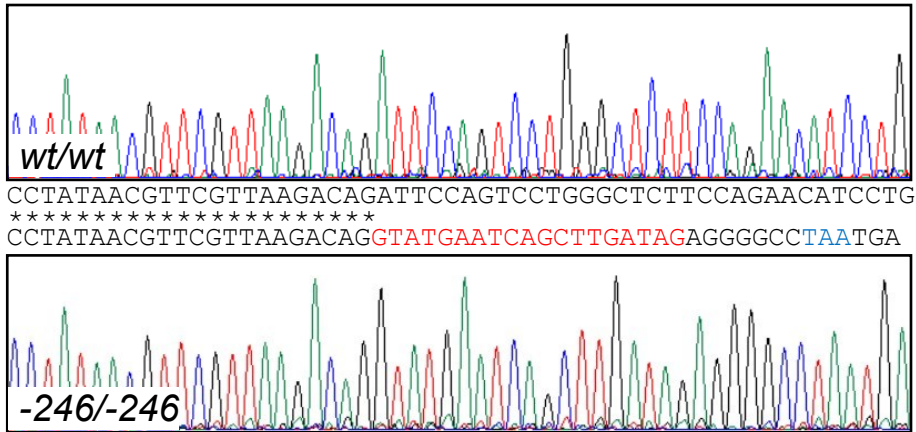**C**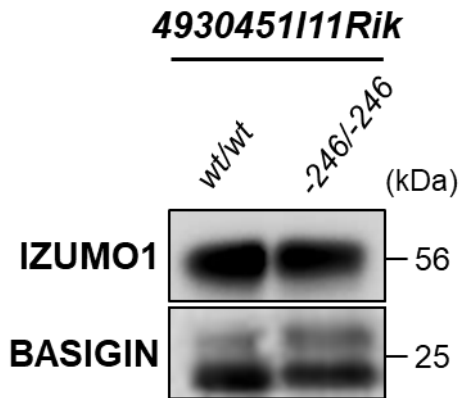**D**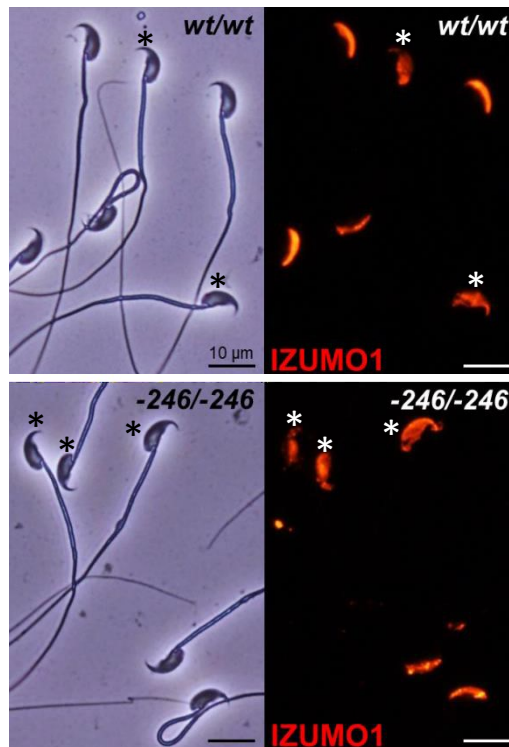



**Fig. S3. Generation of 4930451I11Rik TM-deleted mice with CRISPR/Cas9.** (A) Direct sequencing waveforms of the 246 bp deletions around the third exon of the *4930451I11Rik* gene. Exons and introns are indicated by black and red letters, respectively. (B) Direct sequencing waveforms from testis cDNA in 4930451I11Rik TM-deleted mice. A part of the second intron (5'-GTATGAATCAGCTTGATAG-3') and stop codon are indicated by red and blue letters, respectively. 19 bps of the second intron were abnormally expressed in the testis of 4930451I11Rik TM-deleted mice. Nucleotides that match between wild-type and TM-deleted (-246/-246) mice are indicated by asterisks (226 of 336 bp match in wild-type mice). (C) Immunoblot analysis of IZUMO1 using sperm lysates from 4930451I11Rik TM-deleted mice. There are no differences of IZUMO1 localization between wild-type and 4930451I11Rik TM-deleted spermatozoa. BASIGIN was used as a loading control. (D) Immunostaining of IZUMO1 in 4930451I11Rik TM-deleted spermatozoa. IZUMO1 is used as a marker of the acrosome reaction. Acrosome reaction occurred in 4930451I11Rik TM-deleted (-246/-246) spermatozoa. Acrosome-reacted spermatozoa (determined by whole head pattern of IZUMO1) are indicated by asterisks. Scale bars: 10  $\mu$ m.

**A**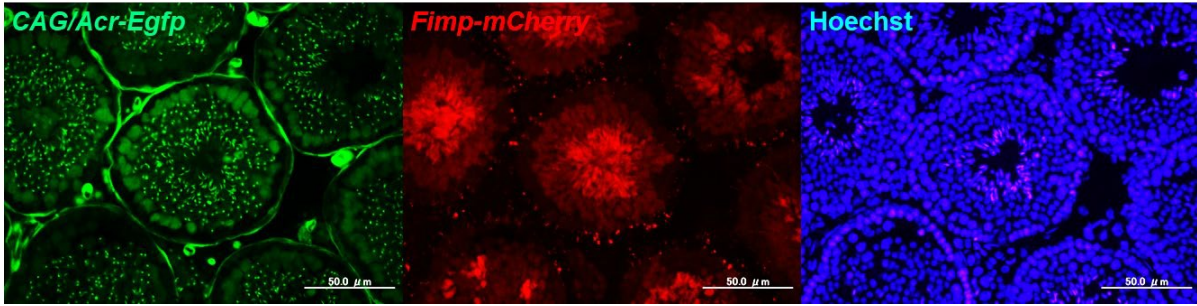**B**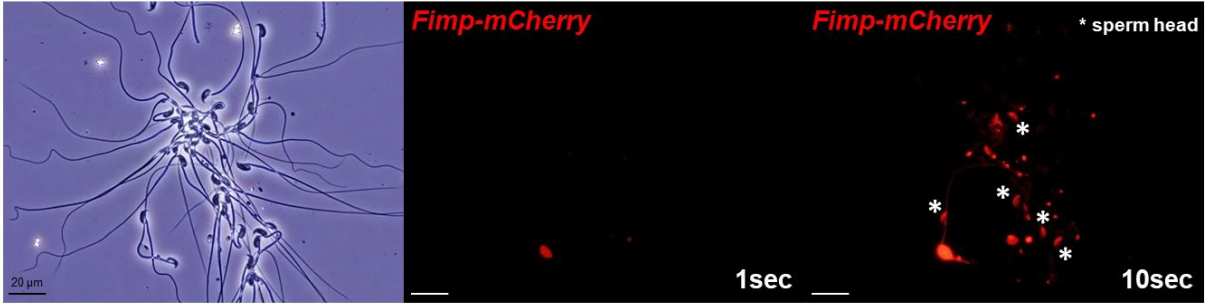**C**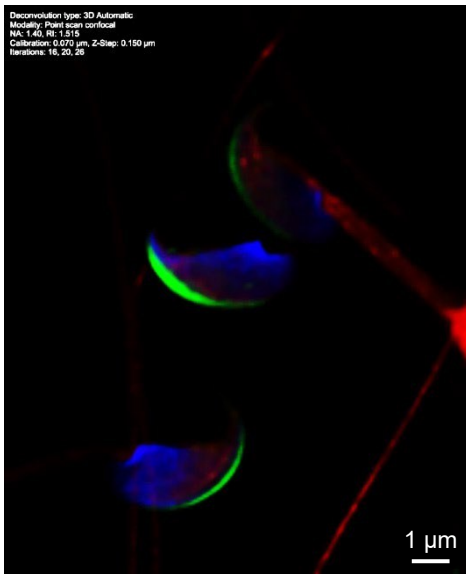**D**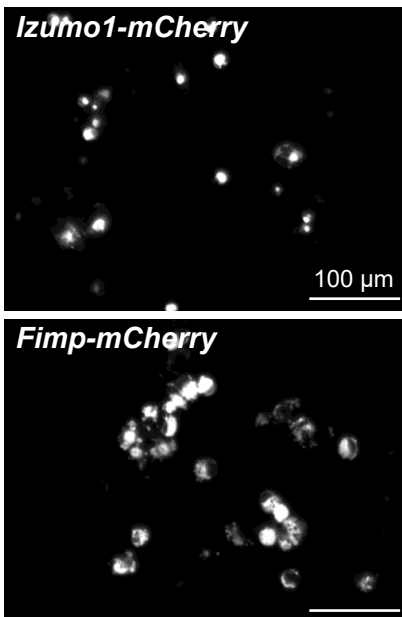**E**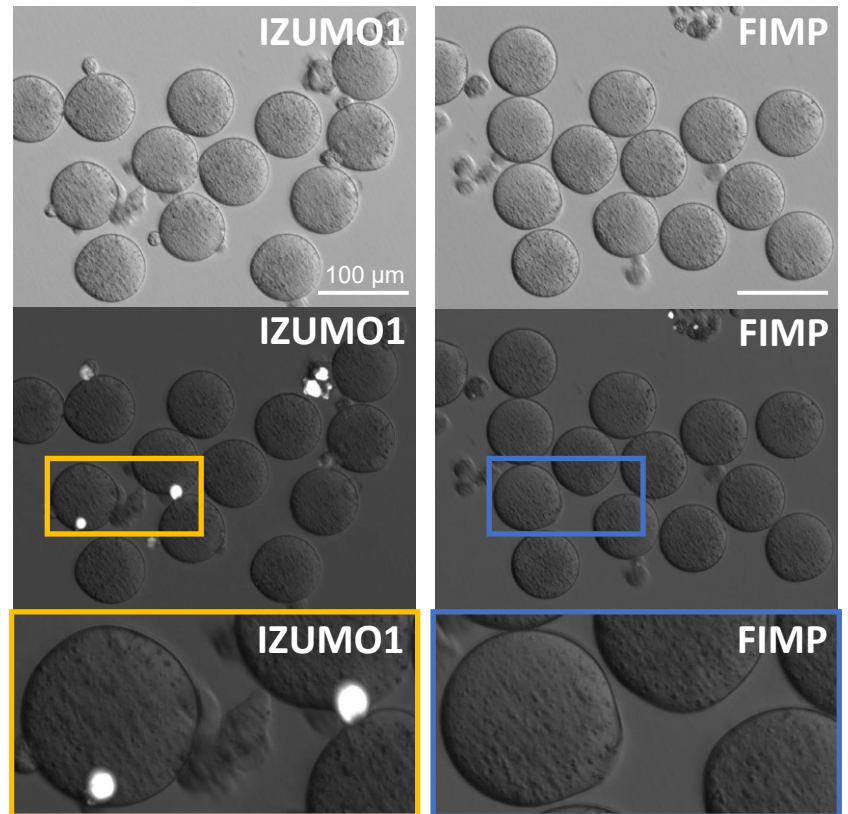

**Fig. S4. Analysis of *Fimp-mCherry* transgenic mice and COS-7-oocyte binding assay. (A)**

Representative testicular histology of frozen sections of *Fimp-mCherry* transgenic (Tg) mice. The *Fimp-mCherry* Tg mice had another transgene [*CAG/Acr-Egfp*] which expressed EGFP throughout the entirety of the mouse and sperm acrosome. Spermatogenesis in *Fimp* KO (-1/-1) mice looked normal compared to that in wild-type mice. Scale bars: 50  $\mu$ m. (B) Fluorescent observation of *Fimp-mCherry* Tg mouse spermatozoa. Although mCherry signals could not be detected on the sperm head using a short exposure time (1 sec), the signals could be observed on sperm head using a longer duration of exposure (10 sec). Most of the FIMP-mCherry protein in cauda epididymal spermatozoa was concentrated in cytoplasmic droplets. Sperm heads with red signals are indicated by asterisks. Scale bars: 20  $\mu$ m. (C) Confocal microscopic observation of *Fimp-mCherry* Tg mouse spermatozoa. The TM form of FIMP-mCherry fused protein is detected on the equatorial segment of the sperm head in acrosome-intact spermatozoa. Scale bar: 1  $\mu$ m. (D) Observation of COS-7 cells expressing *Izumo1-mCherry* (upper panel, white signals) and *Fimp-mCherry* (lower panel, white signals) 2 days after transfection. Scale bars: 100  $\mu$ m. (E) COS-7-oocyte binding assay. COS-7 cells expressing IZUMO1-mCherry (white signals) adhere to the plasma membrane of zona pellucida (ZP)-free oocytes, whereas the ones overexpressing FIMP-mCherry could not bind to the oocyte membrane. Scale bars: 100  $\mu$ m. COS-7-oocyte binding assay was performed as described previously (8).

**A**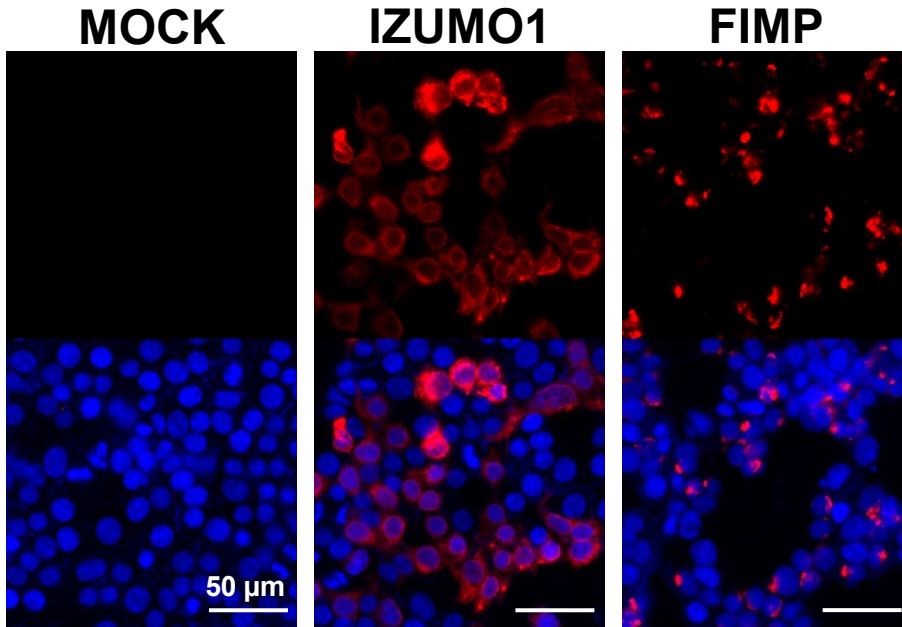**B**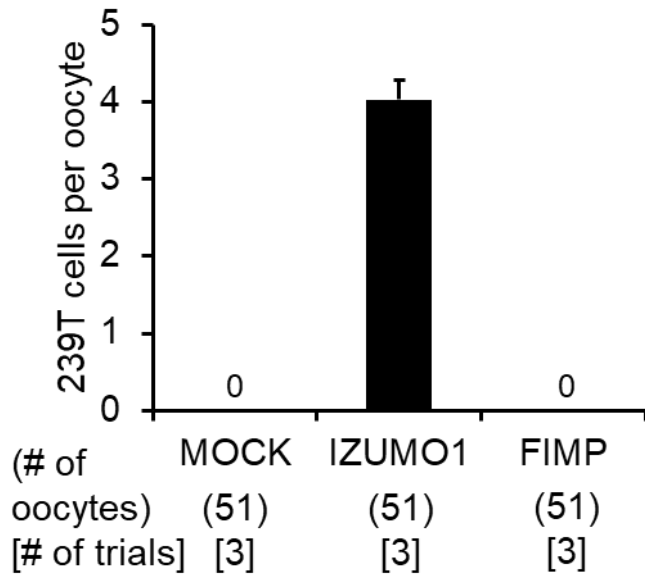**C**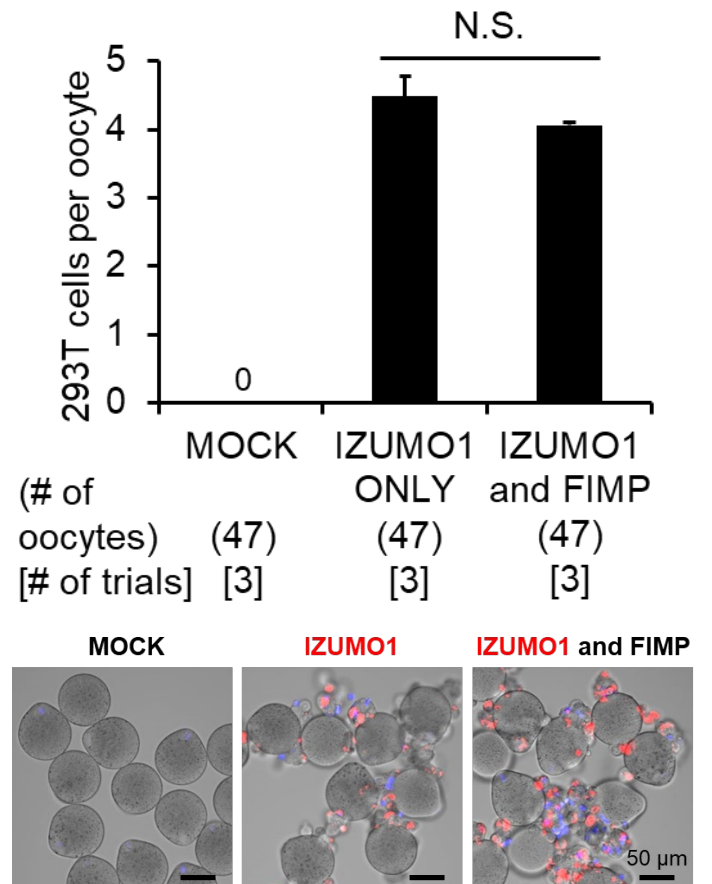

**Fig. S5. HEK293T-oocyte binding assay.** (A) Observation of HEK293T cells expressing *Izumo1-mCherry* (middle panel, red signals) and *Fimp-mCherry* (right panel, red signals) 2 days after transfection. Hoechst staining is indicated by blue signals. Scale bars: 50  $\mu\text{m}$ . (B) HEK293T cells expressing mCherry-tagged IZUMO1 (red signals) adhere to the plasma membrane of ZP-free oocytes, whereas the ones overexpressing FLAG-tagged FIMP could not bind to the oocyte membrane. Hoechst staining is indicated by blue signals. Scale bars: 50  $\mu\text{m}$ . (C) HEK293T cells solely expressing IZUMO1-mCherry showed a comparable index of oocyte binding compared with the ones simultaneously expressing IZUMO1-mCherry and FIMP-FLAG. Scale bars: 50  $\mu\text{m}$ .

**Table S1. List of primers.**

| Figure      | Sequence (5' to 3')                   | Name                            |
|-------------|---------------------------------------|---------------------------------|
| 1A, 1B, 1D  | TGTGGATGTTGATGGCTGAG                  | <i>4930451111Rik</i>            |
|             | AGAAGGCAGGGTAGATGTGT                  |                                 |
|             | TGGATATGCCCTTGACTATAATGAG             | <i>Hprt</i>                     |
|             | TGGCAACATCAACAGGACTC                  |                                 |
| 1C          | GATTATCCGGACTCAGACCAAG                | Human <i>C16ORF92</i>           |
|             | CAGGATGTGATGGAAGAGCC                  |                                 |
|             | AATCCCATCACCATCTTCCAG                 | Human <i>GAPDH</i>              |
|             | ATGACCCTTTTGGCTCCC                    |                                 |
| 3A, 3B, S3A | GCCTTCTTGCTGTGGCCCGG                  | Primer #1                       |
|             | CGCCTGCAGCCTGGGAGG                    | Primer #2                       |
| 3C, S3B     | ATGAAGCTGTGGCTGTGGGTAGC               | TM-deletion                     |
|             | TCACCTCAGCTGGCTCTGGCTG                |                                 |
| 4A          | AATCTAGAGCCGCCATGAAGCTGTGGCTGTGGGTAGC | TM form for Tg                  |
|             | TTAAGCTTGGCCCCTTCTGGAAGTTCACATGC      |                                 |
|             | TTAAGCTTGTGAGCAAGGGCGAGGAGGATAAC      | mCherry for Tg                  |
|             | TTCTCGAGTTACTTGTACAGCTCGTCCATGCCGC    |                                 |
| 4A, 4B      | TTGAGCGGGCCGCTTGCGCACTGG              | Primer #3                       |
|             | GGCCCCTTCTGGAAGTTCACATGC              | Primer #4                       |
| S1A         | ATGAAGCTGTGGCTGTGGGTAGC               | <i>4930451111Rik</i> (TM form)  |
|             | TTAGGCCCTTCTGGAAGTTCACATG             |                                 |
|             | ATGAAGCTGTGGCTGTGGGTAGC               | <i>4930451111Rik</i>            |
|             | TCACCTCAGCTGGCTCTGGCTG                | (secreted form)                 |
| S2A         | GGCCAGCCCCAGGCC                       | <i>4930451111Rik</i> genotyping |
|             | GGAGATCAGATGAGGAGGGACACATAGG          |                                 |

## References

1. Y. Fujihara *et al.*, Sperm equatorial segment protein 1, SPESP1, is required for fully fertile sperm in mouse. *J Cell Sci* **123**, 1531-1536 (2010).
2. Y. Fujihara *et al.*, Expression of TEX101, regulated by ACE, is essential for the production of fertile mouse spermatozoa. *Proc Natl Acad Sci U S A* **110**, 8111-8116 (2013).
3. M. Muto, Y. Fujihara, T. Tobita, D. Kiyozumi, M. Ikawa, Lentiviral Vector-Mediated Complementation Restored Fetal Viability but Not Placental Hyperplasia in Plac1-Deficient Mice. *Biol Reprod* **94**, 6 (2016).
4. Y. Fujihara *et al.*, SPACA1-deficient male mice are infertile with abnormally shaped sperm heads reminiscent of globozoospermia. *Development* **139**, 3583-3589 (2012).
5. Y. Satouh, N. Inoue, M. Ikawa, M. Okabe, Visualization of the moment of mouse sperm-egg fusion and dynamic localization of IZUMO1. *J Cell Sci* **125**, 4985-4990 (2012).
6. Y. Fujihara, A. Oji, T. Larasati, K. Kojima-Kita, M. Ikawa, Human Globozoospermia-Related Gene Spata16 Is Required for Sperm Formation Revealed by CRISPR/Cas9-Mediated Mouse Models. *Int J Mol Sci* **18** (2017).
7. K. Tokuhiro, M. Ikawa, A. M. Benham, M. Okabe, Protein disulfide isomerase homolog PDILT is required for quality control of sperm membrane protein ADAM3 and male fertility [corrected]. *Proc Natl Acad Sci U S A* **109**, 3850-3855 (2012).
8. N. Inoue *et al.*, Molecular dissection of IZUMO1, a sperm protein essential for sperm-egg fusion. *Development* **140**, 3221-3229 (2013).
